# Supplementary material
Source: Research Square preprint supplement (doi:10.21203/rs.3.rs-8854057/v1)
Supplement: Supplementary file 1 [file 3778cd7b3420776301db9f71.pdf]

## Supplementary file 1: Observational studies in epidemiology: STROBE guidelines

STROBE Statement—Checklist of items that should be included in reports of cross-sectional studies

Developed from:

von Elm E, Altman DG, Egger M, Pocock SJ, Gøtzsche PC, Vandenbroucke JP; STROBE Initiative. Strengthening the Reporting of Observational Studies in Epidemiology (STROBE) statement: guidelines for reporting observational studies. *BMJ*. 2007 Oct 20;335(7624):806-8. doi: 10.1136/bmj.39335.541782.AD.

|                              | Item No | Recommendation                                                                                                                                                                       | Reported on page # |
|------------------------------|---------|--------------------------------------------------------------------------------------------------------------------------------------------------------------------------------------|--------------------|
| <b>Title and abstract</b>    | 1       | (a) Indicate the study's design with a commonly used term in the title or the abstract                                                                                               | 1                  |
|                              |         | (b) Provide in the abstract an informative and balanced summary of what was done and what was found                                                                                  | 6                  |
| <b>Introduction</b>          |         |                                                                                                                                                                                      |                    |
| Background/rationale         | 2       | Explain the scientific background and rationale for the investigation being reported                                                                                                 | 8-10               |
| Objectives                   | 3       | State specific objectives, including any prespecified hypotheses                                                                                                                     | 10                 |
| <b>Methods</b>               |         |                                                                                                                                                                                      |                    |
| Study design                 | 4       | Present key elements of study design early in the paper                                                                                                                              | 11                 |
| Setting                      | 5       | Describe the setting, locations, and relevant dates, including periods of recruitment, exposure, follow-up, and data collection                                                      | 11-12              |
| Participants                 | 6       | (a) Give the eligibility criteria, and the sources and methods of selection of participants                                                                                          | 11-12              |
| Variables                    | 7       | Clearly define all outcomes, exposures, predictors, potential confounders, and effect modifiers. Give diagnostic criteria, if applicable                                             | 13-14              |
| Data sources/<br>measurement | 8*      | For each variable of interest, give sources of data and details of methods of assessment (measurement). Describe comparability of assessment methods if there is more than one group | 11-12 & 14         |
| Bias                         | 9       | Describe any efforts to address potential sources of bias                                                                                                                            | 14                 |
| Study size                   | 10      | Explain how the study size was arrived at                                                                                                                                            | 18                 |
| Quantitative variables       | 11      | Explain how quantitative variables were handled in the analyses. If applicable, describe which groupings were chosen and why                                                         | 11-12 & 14         |
| Statistical methods          | 12      | (a) Describe all statistical methods, including those used to control for confounding                                                                                                | 14                 |
|                              |         | (b) Describe any methods used to examine subgroups and interactions                                                                                                                  | 14                 |
|                              |         | (c) Explain how missing data were addressed                                                                                                                                          | 14                 |
|                              |         | (d) If applicable, describe analytical methods taking account of sampling strategy                                                                                                   | N/A                |
|                              |         | (e) Describe any sensitivity analyses                                                                                                                                                | N/A                |
| <b>Results</b>               |         |                                                                                                                                                                                      |                    |
| Participants                 | 13*     | (a) Report numbers of individuals at each stage of study—eg numbers potentially eligible, examined for eligibility, confirmed                                                        | 18                 |

|                          |     |                                                                                                                                                                                                              |                 |
|--------------------------|-----|--------------------------------------------------------------------------------------------------------------------------------------------------------------------------------------------------------------|-----------------|
|                          |     | eligible, included in the study, completing follow-up, and analysed                                                                                                                                          |                 |
|                          |     | (b) Give reasons for non-participation at each stage                                                                                                                                                         | 18              |
|                          |     | (c) Consider use of a flow diagram                                                                                                                                                                           | N/A             |
| Descriptive data         | 14* | (a) Give characteristics of study participants (eg demographic, clinical, social) and information on exposures and potential confounders                                                                     | 18-19 – Table I |
|                          |     | (b) Indicate number of participants with missing data for each variable of interest                                                                                                                          | 18-19 – Table I |
| Outcome data             | 15* | Report numbers of outcome events or summary measures                                                                                                                                                         | 21              |
| Main results             | 16  | (a) Give unadjusted estimates and, if applicable, confounder-adjusted estimates and their precision (eg, 95% confidence interval). Make clear which confounders were adjusted for and why they were included | 22-27           |
|                          |     | (b) Report category boundaries when continuous variables were categorized                                                                                                                                    | 22-27           |
|                          |     | (c) If relevant, consider translating estimates of relative risk into absolute risk for a meaningful time period                                                                                             | N/A             |
| Other analyses           | 17  | Report other analyses done – eg analyses of subgroups and interactions, and sensitivity analyses                                                                                                             | N/A             |
| <b>Discussion</b>        |     |                                                                                                                                                                                                              |                 |
| Key results              | 18  | Summarise key results with reference to study objectives                                                                                                                                                     | 29              |
| Limitations              | 19  | Discuss limitations of the study, taking into account sources of potential bias or imprecision. Discuss both direction and magnitude of any potential bias                                                   | 35-36           |
| Interpretation           | 20  | Give a cautious overall interpretation of results considering objectives, limitations, multiplicity of analyses, results from similar studies, and other relevant evidence                                   | 30-34           |
| Generalisability         | 21  | Discuss the generalisability (external validity) of the study results                                                                                                                                        | 35-36           |
| <b>Other information</b> |     |                                                                                                                                                                                                              |                 |
| Funding                  | 22  | Give the source of funding and the role of the funders for the present study and, if applicable, for the original study on which the present article is based                                                | 3               |

## Supplementary file 2 : COREQ checklist

### Consolidated criteria for reporting qualitative studies (COREQ): 32-item checklist

Developed from:

Tong A, Sainsbury P, Craig J. Consolidated criteria for reporting qualitative research (COREQ): a 32-item checklist for interviews and focus groups. *International Journal for Quality in Health Care*. 2007. Volume 19, Number 6: pp. 349 – 357

| Item No                                        | Guide Questions/Description                                                                                                                              | Reported on Page # |
|------------------------------------------------|----------------------------------------------------------------------------------------------------------------------------------------------------------|--------------------|
| <b>Domain 1: Research team and reflexivity</b> |                                                                                                                                                          |                    |
| <b>Personal Characteristics</b>                |                                                                                                                                                          |                    |
| 1. Interviewer/facilitator                     | Which author/s conducted the interview or focus group?                                                                                                   | Pg 15              |
| 2. Credentials                                 | What were the researcher's credentials? E.g., PhD, MD                                                                                                    | Pg 15-16           |
| 3. Occupation                                  | What was their occupation at the time of the study?                                                                                                      | Pg 15-16           |
| 4. Gender                                      | Was the researcher male or female?                                                                                                                       | Pg 15-16           |
| 5. Experience and training                     | What experience or training did the researcher have?                                                                                                     | Pg 15-16           |
| <b>Relationship with participants</b>          |                                                                                                                                                          |                    |
| 6. Relationship established                    | Was a relationship established prior to study commencement?                                                                                              | Pg 15-17           |
| 7. Participant knowledge of the interviewer    | What did the participants know about the researcher? e.g. personal goals, reasons for doing the research?                                                | Pg 15-17           |
| 8. Interviewer characteristics                 | What characteristics were reported about the interviewer/facilitator? e.g. Bias, assumptions, reasons and interests in the research topic                | Pg 15-17           |
| <b>Domain 2: study design</b>                  |                                                                                                                                                          |                    |
| <b>Theoretical framework</b>                   |                                                                                                                                                          |                    |
| 9. Methodological orientation and Theory       | What methodological orientation was stated to underpin the study? e.g. grounded theory, discourse analysis, ethnography, phenomenology, content analysis | Pg 15-17           |
| <b>Participant selection</b>                   |                                                                                                                                                          |                    |
| 10. Sampling                                   | How were participants selected? e.g., purposive, convenience, consecutive, snowball                                                                      | Pg 15-17           |
| 11. Method of approach                         | How were participants approached? e.g., face-to-face, telephone, mail, email                                                                             | Pg 15-17           |
| 12. Sample size                                | How many participants were in the study?                                                                                                                 | Pg 15-17           |
| 13. Non-participation Setting                  | How many people refused to participate or dropped out? Reasons?                                                                                          | Pg 15-17           |
| 14. Setting of data collection                 | Where was the data collected? e.g., home, clinic, workplace                                                                                              | Pg 15-17           |

| <b>Item No</b>                         | <b>Guide Questions/Description</b>                                                                                               | <b>Reported on Page #</b> |
|----------------------------------------|----------------------------------------------------------------------------------------------------------------------------------|---------------------------|
| 15. Presence of nonparticipants        | Was anyone else present besides the participants and researchers?                                                                | N/A                       |
| 16. Description of sample              | What are the important characteristics of the sample? e.g. demographic data, date                                                | Pg 20                     |
| <b>Data collection</b>                 |                                                                                                                                  |                           |
| 17. Interview guide                    | Were questions, prompts, and guides provided by the authors? Was it pilot tested?                                                | Pg. 15-17 – appendix 3    |
| 18. Repeat interviews                  | Were repeat interviews carried out? If yes, how many?                                                                            | N/A                       |
| 19. Audio/visual recording             | Did the research use audio or visual recording to collect the data?                                                              | Pg. 15-17                 |
| 20. Field notes                        | Were field notes made during and/or after the interview or focus group?                                                          | Pg. 15-17                 |
| 21. Duration                           | What was the duration of the interviews or focus group?                                                                          | Pg. 15-17                 |
| 22. Data saturation                    | Was data saturation discussed?                                                                                                   | Pg. 15-17                 |
| 23. Transcripts returned               | Were transcripts returned to participants for comment and/or correction?                                                         | N/A                       |
| <b>Domain 3: analysis and findings</b> |                                                                                                                                  |                           |
| <b>Data analysis</b>                   |                                                                                                                                  |                           |
| 24. Number of data coders              | How many data coders coded the data?                                                                                             | Pg 15-17                  |
| 25. Description of the coding tree     | Did the authors provide a description of the coding tree?                                                                        | N/A                       |
| 26. Derivation of themes               | Were themes identified in advance or derived from the data?                                                                      | Pg 15-17                  |
| 27. Software                           | What software, if applicable, was used to manage the data?                                                                       | Pg 15-17                  |
| 28. Participant checking               | Did participants provide feedback on the findings?                                                                               | N/A                       |
| <b>Reporting</b>                       |                                                                                                                                  |                           |
| 29. Quotations presented               | Were participant quotations presented to illustrate the themes/findings? Was each quotation identified? e.g., participant number | Pg 21-27                  |
| 30. Data and findings consistent       | Was there consistency between the data presented and the findings?                                                               | Pg 21-27                  |
| 31. Clarity of major themes            | Were major themes clearly presented in the findings?                                                                             | Pg 21-27                  |
| 32. Clarity of minor themes            | Is there a description of diverse cases or a discussion of minor themes?                                                         | Pg 21-27                  |

### Supplementary file 3: Interview guide

#### 1) Information on confidentiality, anonymity and registration

Reading or handing over of the information sheet and the consent note; request for registration

Can you give me a first name that you like? This will be your pseudonym during the survey.

#### 2) General information about the respondent

- Before starting the interview, can you introduce yourself in a general way?

Relaunch:

- Where and when were you born? Where did you grow up?

- Are you married? Do you have children? Do you work?

3) Care pathway: the first signs, the various care recourses - formal and informal -, resource persons, difficulties, information received, relations with health professionals, mobility

- Can you tell me about your illness?

Relaunch:

- When did you feel the first sign that worried you?

- What did you think about?

- Who did you talk to at first?

- Where and who did you consult? What were you told? Please tell me about the different places you went, the different people you saw for your care ?

- Who helped you around you in these different stages?

4) Relationship to the body and representations of "femininity" (i.e. what it is to feel "woman") in the context of the disease: the effects of the treatments on the body, the experience of breast amputation, self-image, sexuality, conjugality, perceived discrimination, unveiling of the body, relationship to other women

- Can you tell me about your relationship with your husband?

Relaunch: : did your husband support you?

- What was your husband's reaction?

- How do you feel about your body? Can you look at yourself in the mirror?

- Can you tell me about the effects of the treatments on your body?
